# Supplementary material
Source: HighWire-hosted journal article supplement (https://sti.bmj.com/content/92/7/502)
Supplement: inline-supplementary-material-1 [file inline-supplementary-material-1.pdf]

Appendix 1. Bivariate associations with different methods of meeting male sex partners among gay men from Melbourne, Sydney Queensland, Adelaide and Perth, 2014

|                                                                                                        | Venues only<br>(n=948) | Mobile only<br>(n = 279) | Internet only<br>(n = 160) | Mobile and<br>internet only<br>(n = 259) | Mobile and<br>venues<br>(n=688) | Internet and<br>venues<br>(n=322) | Mobile, internet<br>and venues<br>(n=1460) | F or X <sup>2</sup> test<br>result | p value |
|--------------------------------------------------------------------------------------------------------|------------------------|--------------------------|----------------------------|------------------------------------------|---------------------------------|-----------------------------------|--------------------------------------------|------------------------------------|---------|
|                                                                                                        | n (%)                  | n (%)                    | n (%)                      | n (%)                                    | n (%)                           | n (%)                             | n (%)                                      |                                    |         |
| Age – mean (SD)                                                                                        | 41.9 (13.7)            | 31.1 (9.6)               | 39.4 (13.1)                | 33.5 (10.5)                              | 31.7 (9.2)                      | 43.2 (13.6)                       | 34.7 (10.2)                                | 127.8                              | <.001   |
| Aboriginal or Torres<br>Strait Islander heritage                                                       | 31 (3.3)               | 9 (3.2)                  | 5 (3.2)                    | 10 (3.9)                                 | 21 (3.1)                        | 12 (3.8)                          | 52 (3.6)                                   | 0.53 (4)                           | .99     |
| Employment status                                                                                      |                        |                          |                            |                                          |                                 |                                   |                                            |                                    |         |
| Employed                                                                                               | 691 (73.4)             | 224 (80.9)               | 111 (69.4)                 | 205 (79.2)                               | 560 (81.4)                      | 234 (72.9)                        | 1175 (80.8)                                | 27.7 (4)                           | <.001   |
| Education levels                                                                                       |                        |                          |                            |                                          |                                 |                                   |                                            | 28.1 (12)                          | <.001   |
| Up to year 10 of high<br>school                                                                        | 96 (10.2)              | 13 (4.7)                 | 23 (14.4)                  | 16 (6.2)                                 | 36 (5.2)                        | 25 (7.8)                          | 102 (7.0)                                  |                                    |         |
| Year 12 of high school<br>(leaving certificate)                                                        | 155 (16.5)             | 54 (19.6)                | 25 (15.6)                  | 58 (22.4)                                | 122 (17.7)                      | 49 (15.3)                         | 277 (19.0)                                 |                                    |         |
| Trade certificate                                                                                      | 207 (22.0)             | 62 (22.5)                | 28 (17.5)                  | 56 (21.6)                                | 132 (19.2)                      | 75 (23.4)                         | 339 (23.3)                                 |                                    |         |
| University degree                                                                                      | 481 (51.2)             | 146 (53.1)               | 84 (52.5)                  | 129 (49.8)                               | 398 (57.8)                      | 172 (53.6)                        | 737 (50.7)                                 |                                    |         |
| Any anal intercourse<br>without condoms with<br>casual male partners in<br>the previous six<br>months  | 189 (19.9)             | 50 (17.9)                | 30 (18.8)                  | 82 (31.7)                                | 224 (32.6)                      | 115 (35.7)                        | 627 (42.9)                                 | 170.7 (4)                          | <.001   |
| Any anal intercourse<br>without condoms with<br>regular male partners<br>in the previous six<br>months | 248 (26.2)             | 94 (33.7)                | 59 (36.9)                  | 79 (30.5)                                | 247 (35.9)                      | 93 (28.9)                         | 541 (37.1)                                 | 36.0 (4)                           | <.001   |

|                                                              |             |            |            |            |             |             |             |           |            |       |
|--------------------------------------------------------------|-------------|------------|------------|------------|-------------|-------------|-------------|-----------|------------|-------|
| No. of male sex partners in previous six months              |             |            |            |            |             |             |             |           | 742.4 (16) | <.001 |
| 0-1                                                          | 177 (18.8)  | 71(25.6)   | 54 (34.0)  | 25 (9.7)   | 18 (2.6)    | 15 (4.7)    | 33 (2.3)    |           |            | <.001 |
| 2-5                                                          | 404 (42.8)  | 153 (55.0) | 83 (52.2)  | 152 (58.9) | 290 (42.5)  | 127 (39.9)  | 380 (26.2)  |           |            |       |
| 6-10                                                         | 163 (17.3)  | 26 (9.4)   | 10 (6.3)   | 56 (21.7)  | 172 (25.2)  | 68 (21.4)   | 360 (24.8)  |           |            |       |
| 11 – 20                                                      | 105 (11.1)  | 18 (6.5)   | 7 (4.4)    | 15 (5.8)   | 119 (17.4)  | 49 (15.4)   | 299 (20.6)  |           |            |       |
| 21-50                                                        | 67 (7.1)    | 8 (2.9)    | 4 (2.5)    | 7 2.7)     | 63 (9.2)    | 44 (13.8)   | 269 (18.6)  |           |            |       |
| More than 50                                                 | 27 (2.9)    | 2 (0.7)    | 1 (0.6)    | 3 (1.2)    | 20 (2.9)    | 15 (4.7)    | 108 (7.5)   |           |            |       |
| Any STI test in previous 12 months                           | 672 (70.9)  | 218 (78.1) | 116 (72.5) | 191 (73.7) | 564 (82.0)  | 252 (78.3)  | 1231 (84.3) | 71.7 (4)  |            | <.001 |
| STI diagnosis in previous 12 months                          | 94 (10.4)   | 29 (10.7)  | 11 (7.4)   | 32 (12.8)  | 143 (21.5)  | 56 (17.6)   | 337 (24.1)  | 101.9 (4) |            | <.001 |
| HIV test in previous 12 months                               | 590 (64.7)  | 213 (77.7) | 114 (73.5) | 184 (72.4) | 555 (82.5)  | 227 (73.5)  | 1163 (82.1) | 110.9 (4) |            | <.001 |
| HIV status                                                   |             |            |            |            |             |             |             |           |            |       |
| HIV-positive                                                 | 100 (10.5)  | 12 (4.4)   | 16 (10.4)  | 19 (7.5)   | 42 (6.1)    | 55 (17.1)   | 184 (12.6)  | 60.9 (8)  |            | <.001 |
| HIV-negative                                                 | 729 (76.9)  | 229 (83.9) | 120 (77.9) | 211 (83.4) | 582 (84.6)  | 233(72.4)   | 1150 (78.8) |           |            |       |
| Unknown/untested                                             | 119 (12.6)  | 32 (11.7)  | 18 (11.7)  | 23 (9.1)   | 64 (9.3)    | 34 (10.6)   | (126 (8.6)  |           |            |       |
| Any illicit drug use in previous six months                  | 569 (60.0)  | 166 (59.5) | 93 (58.1)  | 159 (61.4) | 487 (70.8)  | 240 (74.5)  | 1090 (74.7) | 87.5 (4)  |            | <.001 |
| Number of offline places used to meet sex partners-mean (SD) | 2.16 (1.50) | 0          | 0          | 0          | 2.42 (1.53) | 2.61 (1.83) | 3.50 (2.36) | 433       |            | <.001 |
| City of recruitment                                          |             |            |            |            |             |             |             | 42.1 (16) |            | <.001 |
| Sydney                                                       | 401 (26.9)  | 88 (31.5)  | 50 (31.3)  | 80 (30.9)  | 261(17.5)   | 110 (7.4)   | 502 (33.6)  |           |            |       |
| Melbourne                                                    | 246 (19.6)  | 95 (34.1)  | 46 (28.7)  | 85 (32.8)  | 205 (16.4)  | 93 (7.4)    | 482 (38.5)  |           |            |       |
| Brisbane                                                     | 147 (22.8)  | 35 (12.5)  | 24 (15.0)  | 49 (18.9)  | 97 (15.0)   | 57 (8.8)    | 237 (36.7)  |           |            |       |
| Adelaide                                                     | 81 (23.1)   | 34 (12.2)  | 17 (10.6)  | 24 (9.3)   | 55 (15.7)   | 24 (6.9)    | 115 (32.9)  |           |            |       |
| Perth                                                        | 73 (19.4)   | 27 (9.7)   | 23 (14.4)  | 21 (8.1)   | 70 (18.6)   | 38 (10.1)   | 124 (33.0)  |           |            |       |
